# Supplementary material
Source: HighWire-hosted journal article supplement (https://bjsm.bmj.com/content/54/11/627)
Supplement: inline-supplementary-material-6 [file inline-supplementary-material-6.xlsx]

## Sheet: Sheet1
	Prognostic value of MRI in arthroscopic treatment of chronic patellar tendinopathy: a prospective cohort study	Isometric Contractions Are More Analgesic Than Isotonic Contractions for Patellar Tendon Pain: An In-Season Randomized Clinical Trial	Effectiveness of Shockwave Treatment Combined With Eccentric Training for Patellar Tendinopathy: A Double-Blinded Randomized Study	Randomized controlled trial comparing the effectiveness of the ultrasound-guided galvanic electrolysis technique (USGET) versus conventional electro-physiotherapeutic treatment on patellar tendinopathy	Effect of patellar strap and sports tape on pain in patellar tendinopathy: A randomized controlled trial	Do isometric and isotonic exercise programs reduce pain in athletes with patellar tendinopathy in-season? A randomised clinical trial	Using platelet-rich plasma to treat jumper's knees: Exploring the effect of a second closely-timed infiltration	Double-Blind Randomized Controlled Trial: Injection of Autologous Blood in the Treatment of Chronic Patella Tendinopathy-A Pilot Study	Wireless Versus Wired Iontophoresis for Treating Patellar Tendinopathy: A Randomized Clinical Trial	Isometric exercise induces analgesia and reduces inhibition in patellar tendinopathy	One injection of platelet-rich plasma associated to a submaximal eccentric protocol to treat chronic jumper's knee	Platelet-rich plasma as a treatment for chronic patellar tendinopathy: comparison of a single versus two consecutive injections	Clinical results after ultrasound-guided intratissue percutaneous electrolysis (EPI®) and eccentric exercise in the treatment of patellar tendinopathy	No difference in effectiveness between focused and radial shockwave therapy for treating patellar tendinopathy: a randomized controlled trial	Surgery for unilateral and bilateral patellar tendinopathy: a seven year comparative study	Are multiple platelet-rich plasma injections useful for treatment of chronic patellar tendinopathy in athletes? A prospective study	Platelet-Rich Plasma as a Treatment for Patellar Tendinopathy: a double-blind, randomized controlled trial	An exercise-based physical therapy program for patients with patellar tendinopathy after platelet-rich plasma injection	Platelet-rich plasma versus focused shock waves in the treatment of jumper's knee in athletes	A single application of low-energy radial extracorporeal shock wave therapy is effective for the management of chronic patellar tendinopathy	Topical glyceryl trinitrate treatment of chronic patellar tendinopathy: a randomised, double-blind, placebo-controlled clinical trial	Pain and activity levels before and after platelet-rich plasma injection treatment of patellar tendinopathy: a prospective cohort study and the influence of previous treatments	Hyaluronan injection therapy for athletic patients with patellar tendinopathy	Comparing the effects of eccentric training with eccentric training and static stretching exercises in the treatment of patellar tendinopathy. A controlled clinical trial	Ultrasound-guided sclerosis of neovessels in patellar tendinopathy: a prospective study of 101 patients	Treatment of chronic patellar tendinopathy with autologous bone marrow stem cells: a 5-year-followup	Ultrasound-guided sclerosing treatment in patients with patellar tendinopathy (jumper's knee). 44-month follow-up.	Arthroscopic management of chronic patellar tendinopathy	Ultrasound-guided injections of hyperosmolar dextrose for overuse patellar tendinopathy: a pilot study	No Effect of Extracorporeal Shockwave Therapy on Patellar Tendinopathy in Jumping Athletes During the Competitive Season	Sclerosing polidocanol injections or arthroscopic shaving to treat patellar tendinopathy/jumper's knee? A randomised controlled study	Skin-derived tenocyte-like cells for the treatment of patellar tendinopathy	Efficacy of an inertial resistance training paradigm in the treatment of patellar tendinopathy in athletes: a case-series study	Use of platelet-rich plasma for the treatment of refractory jumper's knee	The TOPGAME-study: effectiveness of extracorporeal shockwave therapy in jumping athletes with patellar tendinopathy	Patient guided Piezo-electric Extracorporeal Shockwave Therapy as treatment for chronic severe patellar tendinopathy: A pilot study	Corticosteroid injections, eccentric decline squat training and heavy slow resistance training in patellar tendinopathy	Surgical treatment of patellar tendinopathy in athletes. A retrospective multicentric study	Treating patellar tendinopathy with Fascial Manipulation	Low-intensity pulsed ultrasound for chronic patellar tendinopathy: a randomized, double-blind, placebo-controlled trial	High volume ultrasound guided injections at the interface between the patellar tendon and Hoffa's body are effective in chronic patellar tendinopathy: A pilot study	Jumper's knee treatment with extracorporeal shock wave therapy: a long-term follow-up observational study	Ultrasound guided dry needling and autologous blood injection for patellar tendinosis	Eccentric treatment for patellar tendinopathy: a prospective randomised short-term pilot study of two rehabilitation protocols	Extracorporeal Shockwave for Chronic Patellar Tendinopathy	Ultrasound-guided sclerosis of neovessels in painful chronic patellar tendinopathy: a randomized controlled trial	Surgical Treatment Compared with Eccentric Training for Patellar Tendinopathy (Jumper’s Knee)	Superior results with eccentric compared to concentric quadriceps training in patients with jumper's knee: a prospective randomised study	No effect of eccentric training on jumper's knee in volleyball players during the competitive season: a randomized clinical trial
Authors	Ogon P, Izadpanah K, Eberbach H, Lang G, Sudkamp NP, Maier D.	Rio, E, van Ark M, Docking S, Moseley GL, Kidgell D, Gaida JE, van den Akker-Scheek I, Zwerver J, Cook J.	Thijs KM, Zwerver J, Backx FJ, Steeneken V, Rayer S, Groeneboom P, Moen MH.	Abat F, Sánchez-Sánchez JL, Martín-Nogueras AM, Calvo-Arenillas JI, Yajeya J, Méndez-Sánchez R, Monllau JC, Gelber PE.	de Vries A, Zwerver J, Diercks R, Tak I, van Berkel S, van Cingel R, van der Worp H, van den Akker-Scheek I.	van Ark M, Cook JL, Docking SI, Zwerver J, Gaida, JE, van den Akker-Scheek I, Rio E.	Kaux JF, Croisier JL, Forthomme B, Le Goff C, Buhler F, Savanier B, Delcour S, Gothot A, Crielaard JM.	Resteghini P, Khanbhai TA, Mughal S, Sivardeen Z.	Rigby JH, Mortensen BB, Draper DO.	Rio, E, Kidgell D, Purdam C, Gaida J, Moseley GL, Pearce AJ, Cook J.	Kaux JF, Croisier JL, Bruyere O, Rodriguez De La Cruz C, Forthomme B, Brabant G, Lapraille S, Lonneux V, Noel D, Le Goff C, Gothot A, Collette J, Crielaard JM.	Zayni R, Thaunat M, Fayard JM, Hager JP, Carrillon Y, Clechet J, Gadea F, Archbold P, Sonnery Cottet B.	Abat F, Gelber PE, Polidori F, Monllau JC, Sanchez-Ibañez JM.	van der Worp H, Zwerver J, Hamstra M, van den-Akker-Scheek I, Diercks RL.	Maffulli N, Oliva F, Maffulli G, King JB, Del Buono A.	Charousset C, Zaoui A, Bellaiche L, Bouyer B.	Dragoo JL, Wasterlain AS, Braun HJ, Nead KT.	van Ark M, van den Akker-Scheek I, Meijer LTB, Zwerver J.	Vetrano M, Castorina A, Vulpiani MC, Baldini R, Pavan A, Ferretti A.	Furia JP, Rompe JD, Cacchio A, Del Buono A, Maffulli N.	Steunebrink M, Zwerver J, Brandsema R, Groenenboom P, van denk Akker-Scheek I, Weir.	Gosens T, den Oudsten BL, Fievez E, van 't Spijker P, Fievez A.	Muneta T, Koga H, Ju YJ, Mochizuki T, Sekiya I.	Dimitrios S, Pantelis M, Kalliopi S.	Hoksrud A, Torgalsen T, Harstad H, Haugen S, Andersen TE, Risberg MA, Bahr R.	Pascual-Garrido C, Rolón A, Makino A.	Hoksrud A, Bahr R.	Pascarella A, Alam M, Pascarella F, Latte C, Di Salvatore MG, Maffulli N.	Ryan M, Wong A, Rabago D, Lee K, Taunton J.	Zwerver J, Hartgens F, Verhagen E, van der Worp H, van den Akker-Scheek, Diercks RL.	Willberg L, Sunding K, Forssblad M, Fahlström M, Alfredson H.	Clarke AW, Alyas F, Morris T, Robertson CJ, Bell J, Connell DA.	Romero-Rodriques D, Gual G, Tesch PA.	Filardo G, Kon E, Della Villa S, Vincentelli F, Fornasari PM, Marcacci M.	Zwerver J, Verhagen E, Hartgens F, van den Akker-Scheek I, Diercks RL.	Zwerver J, Dekker F, Pepping GJ.	Kongsgaard M, Kovanen V, Aagaard P, Doessing S, Hansen P, Laursen AH, Kaldau NC, Kjaer M, Magnusson SP.	Cucurulo T, Louis ML, Thaunat M, Franceschi JP.	Pedrelli A, Stecco C, Day JA.	Warden SJ, Metcalf BR, Kiss ZS, Cook JL, Purdam CR, Bennell KL, Crossley KM.	Crisp T, Khan F, Padhiar N, Morrissey D, King J, Jalan R, Maffulli N, Frcr OC.	Vulpiani MC, Vetrano M, Savoia V, Di Pangrazio E, Trischitta D, Ferretti A.	James SL, Ali K, Pocock C, Robertson C, Walter J, Bell J, Connell D.	Frohm A, Saartok T, Halvorsen K, Renstrom P.	Wang CJ, Ko JY, Chan YS, Weng LH, Hsu SL.	Hoksrud A, Ohberg L, Alfredson H, Bahr R.	Bahr R, Fossan B, Loken S, Engebretsen L.	Jonsson P, Alfredson H.	Visnes H, Hoksrud A, Cook J, Bahr R.
Journal	BMC musculoskeletal disorders 2017 Apr 4;18(1):146	Clinical Journal of Sport Medicine 2017 May;27(3):253-259	Clinical Journal of Sport Medicine 2017 Mar;27(2):89-96.	Journal of Experimental Ortopaedics 2016 Dec;3(1):34. Epub 2016 Nov 16	Scandinavian Journal of Medicine & Science in Sports 2016 Oct;26(10):1217-24	Journal of Science and Medicine in Sport 2016 Sep;19(9):702-6	Journal of Medicine and Science in Sport 2016 Mar;19(3):200-4.	Clinical Journal of Sport Medicine 2016 Jan;26(1):17-23	Journal of Athletic Training 2015 Nov;50(11):1165-73	British Journal of Sports medicine 2015 Oct;49(19):1277-83	The Journal of Sports Medicine and Physical FItness 2015 Sep;55(9):953-61	Muscles Ligaments Tendons Journal 2015 Jul 3;5(2):92-8	Knee Surgery, Sports Traumatology, Arthroscopy 2015 Apr;23(4):1046-52	Knee Surgery, Sports Traumatology, Arthroscopy 2014 Sep;22(9):2026-32.	International Orthopaedics 2014 Aug;38(8):1717-22	The American Journal of Sports Medicine 2014 Apr;42(4):906-11	The American Journal of Sports Medicine 2014 Mar;42(3):610-8	Physical Therapy in Sport 2013 May;14(2):124-30	The American Journal of Sports Medicine 2013 Apr;41(4):795-803	Knee Surgery, Sports Traumatology, Arthroscopy 2013 Feb;21(2):346-50	British Journal of Sports medicine 2013 Jan;47(1):34-9	Internation Orthopaedics 2012 Sep;36(9):1941-	Journal of Orthopaedic Science 2012 Jul;17(4):425-31	Clinical Rehabilitation 2012 May;26(5):423-30	The American Journal of Sports Medicine 2012 Mar;40(3):542-7	Stem Cells international 2012;2012:953510	The American Journal of Sports Medicine 2011 Nov;39(11):2377-80	The American Journal of Sports Medicine 2011 Sep;39(9):1975-83	British Journal of Sports Medicine 2011 Sep;45(12):972-7	The American Journal of Sports Medicine 2011 Jun;39(6):1191-9	British Journal of Sports Medicine 2011 Apr;45(5):411-5	The American Journal of Sports Medicine 2011 Mar;39(3):614-23	Physical Therapy in Sport 2011 Feb;12(1):43-8	International Orthopaedics 2010 Aug;34(6):909-15	BMC Musculoskeletal Disorders 2010 Feb 8;11:28	Journal of Back and Musculoskeletal Rehabilitation 2010;23(3):111-5	Scandinavian Journal of Medicine & Science in sports 2009 Dec;19(6):790-802	Orthopaedics & Traumatology, Surgery and Research 2009 Dec;95(8 Suppl 1):S78-84	Journal of Bodywork and Movement Therapies 2009 Jan;13(1):73-80	Rheumatology 2008 Apr;47(4):467-71	Disability and Rehabilitation 2008;30(20-22):1625-34	Journal of Sports Medicine and Physical Fitness 2007 Sep;47(3):323-8	British journal of Sports Medicine 2007 Aug;41(8):518-21	British journal of Sports Medicine 2007 Jul;41(7):e7	The American Journal of Sports Medicine 2007 Jun;35(6):972-8	The American Journal of Sports Medicine 2006 Nov;34(11):1738-46	The Journal of Bone and Joint Surgery 2006 Aug;88(8):1689-98	British Journal of Sports Medicine 2005 Nov;39(11):847-50	Clinical Journal of Sport Medicine 2005 Jul;15(4):227-34
Study design	Prospective cohort study	Within-season randomized clinical trial	Randomized controlled trial	Randomized controlled trial	Randomized controlled trial	Randomised clinical trial	Prospective, randomized and comparative study	Double-blind randomized controlled study	Randomized controlled clinical trial	Single-blinded randomised cross-over study	-	Randomized prospective consecutive series	-	Randomized controlled trial	Comparative study	Prospective study	Double-blind randomized trial	Prospective case-series study	Randomized controlled trial	Retrospective study	Randomised double-blind placebo controlled clinical trial	A prospective cohort study	Clinical study	Controlled clinical trial	Prospective study	Clinical study	Case series	Case series	Pilot study	Randomized controlled trial	Randomised controlled study	Randomized controlled trial	Case-series study with pre- vs. post-test measurements design	-	Multicentre two-armed randomised controlled trial	Pilot study	Randomized-controlled single-blind trial	Retrospective multicenter study	Pilot study	A randomized, double-blind, placebo-controlled trial	Pilot study	Prospective study	Prospective cohort study	Prospective randomised clinical trial	Randomized controlled clinical trial	Randomized controlled trial	Randomized controlled trial	Prospective randomised study	Randomized clinical trial
Inclusion criteria	1. Age > 18 years, 2. Competitive athlete 3. Operative treatment by means of APR 4. Chronic-refractory, symptomatic PT despite a minimum period of 6 months of non-operative treatment 5. Postoperative follow-up period > 2 years	1. Pain localized to the inferior pole of the patella during jumping and landing activities and during testing on the SLDS 2. Presence of characteristic features on ultrasound imaging (eg, hypoechoic area and/or tendon thickening)	1. Age between 18 and 40 years 2. Presence of PT in participants active in sports at least once a week Patellar tendinopathy was diagnosed by sports medicine physicians based on the following clinical findings: (a) History of knee pain located in the patellar tendon or its patellar insertion related to activity (b) Recognizable palpation tenderness of the patella tendon or its insertion on the pa…	1. Being between 20 and 60 years of age 2. A clinical and ultrasound diagnosis of unilateral insertional patellar tendinopathy 3. Having symptoms for more than one month 4. Being athletically active before injury	1. Between 18 and 50 years of age 2. Pain in the patellar tendon or its patellar or tibial insertion in one or both knees 3. Duration of symptoms exceeding 3 months 4. A Victorian Institute of Sports Assessment questionnaire Patella (VISA-P) score < 80 5. Palpation tenderness of the patellar tendon 6. Active in sports	1. Focal tendon pain at the inferior or superior pole of the patella 2. History of exercise associated knee pain at the same spot	1. Proximal patellar tendinopathy, diagnosed clinically and confirmed by ultrasounds (US) and/or magnetic resonance imaging (MRI) 2. Have experienced other classical conservative treatments (painkillers, NSAIDs, physiotherapy including eccentric rehabilitation (for more than 20 sessions, 3 times a week, progressively intensified) and shock wave therapy (6 to 9 sessions, 2000 shocks, 9 Hz, 3–4 bar…	1. Patients with a clinical diagnosis of PT confirmed by ultrasound examination 2. A program of rehabilitation including eccentric exercise over a period of at least 3 months had failed to produce any significant response	1. Aged 18–45 years 2. Patellar tendon pain lasting longer than 1 month but no longer than 2 years 3. Clinical diagnosis of midsubstance patellar tendinopathy on physical examination from a physician	1. Diagnosis of PT: pain localised to the inferior pole of the patella during jumping and landing activities, and during testing on the single-leg decline squat (SLDS) The diagnosis was confirmed by the presence of characteristic features on ultrasound imaging (eg, hypoechoic area)	1. Upper patellar tendinopathy for longer than 3 months 2. No satisfactory improvement after 3 months of conservative management (including eccentric intervention and shock wave therapy)	1. Chronic anterior knee pain with focal tenderness at the proximal insertion of patellar tendon on clinical examination Diagnosis was performed by an attending orthopedic surgeon and was confirmed by MRI read by an attending radiologist 2. A same nonoperative treatment protocol had been followed for at least 3 months and had failed. This conservative treatment consisted of rest, non-steroidal an…	1. <60 years old 2. History of patellar tendon pain > 4 weeks 3. Tenderness to palpation 4. Functional limitation directly related to the tendon injury 5. Sonographic confirmation of tendon degeneration 6. Injury located at the inferior pole of the patella 7. Blazina's classification ≥ grade 1	1. Aged between 18 and 50 2. A history of pain in the patellar tendon or its insertions in connection with training and/or competition 3. Symptoms present for at least 3 months 4. Palpation tenderness of the patellar tendon 5. VISA-P score below 80 points The diagnosis was primarily based on history and clinical examination; however, in case of doubt with regard to diagnosis, imaging techniques s…	1. Skeletally mature patients aged 18–45 2. A diagnosis of unilateral or bilateral exercise-induced classic jumper’s knee, defined as tendinopathy at the interface between the lower pole of the patella and the patellar tendon and proven by clinical and imaging [(high-resolution real-time ultrasonography (US) or magnetic resonance imaging (MRI)] findings and postoperative histological examination …	1. Anterior chronic knee pain 2. Tenderness at the inferior pole of the patella 3. Pain during provocative tests of the knee extensors 4. Morphological signs of chronic patellar tendinopathy 5. All patients underwent previous recent ultrasonography and magnetic resonance imaging (MRI) (median, 19 days; range, 9-49 days) Hypoechoic regions with the loss of the normal fibrillar architecture on US a…	1. Age ≥ 18 years 2. Diagnosis of PT made by clinical examination (tenderness to palpation at the inferior pole of the patella with the knee fully extended and the quadriceps relaxed) and confirmed by MRI read 3. Persistence of symptoms after 6 weeks (12 sessions) of physical therapy with eccentric exercise	1. History of knee pain in the proximal section of the patellar tendon or its patellar insertion in connection with training and competition 2. Symptoms for over 12 months (current symptoms for at least three months) 3. Age 18–40 4. Palpation tenderness of the corresponding painful area 5. VISA-P score < 80 6. Ultrasound characteristics of a tendon in the degenerative phase (hypoechoic zones) 7.R…	1. Established diagnosis of chronic jumper’s knee at the insertion of the patellar tendon at the lower pole of the patella for at least 6 months before treatment 2. Failure of nonoperative management 3. A washout period of 12 weeks was required between any nonoperative therapy and inclusion in the study 4. Age range from 18 to 50 years 5. Capable of completing questionnaires and of giving informe…	1. History and physical examination positive for chronic patellar tendinopathy 2. Unresponsive to conservative measures including rest, anti-inflammatory drugs, ice, hamstring stretching and strengthening, physical therapy, bracing, and iontophoresis 3. Moderate-to-severe pain at the junction between the patella and patellar tendon, most in knee extension against resistance 4. Impaired function 5…	1. The presence of chronic PT (The diagnosis was based on clinical findings by an experienced sports physician: all patients had a painful tendon related to activity and/or thickened tendon on palpation.) 2. Age of 18–40 years 3. Symptoms present for >3 months	1. Diagnosis of patellar tendinopathy, made on clinical grounds (pain on resisted extension of the knee located at the inferior pole of the patella)	1. Graded stage 2 or 3 by Blazina's classification 2. Knee pain for a minimum of 2 months with other conservative approaches	1. Tenderness with palpation over the inferior pole of the patella 2. Minimum duration of symptoms three months 3. Unsuccessful conservative treatment before entering the study, but not in the preceding one month 4. Positive decline squat	1. A clinical diagnosis of patellar tendinopathy and neovascularization on a power Doppler ultrasound examination corresponding to the painful area The following diagnostic criteria were used to identify patients with patellar tendinopathy: a) History of pain in the patellar tendons or the patellar insertion in connection with training or competition b) Tenderness to palpation corresponding to th…	1. Chronic patellar tendinopathy treated with mononuclear BM-MNCs Indications for BM-MNCS were: a) History of pain (more than 6 months) b) Tenderness on patellar tendon palpation c) Imaging findings of degenerative changes (MRI) 2. Failed previous nonoperative treatment for at least six months 3. Classified as grade III-B according criteria described by Blanzina and later modified by Warden et al.	1. A clinical diagnosis of jumper’s knee The following diagnostic criteria were used: a) History of pain in the patellar tendon or the patellar insertion in connection with training or competition b) Tenderness to palpation corresponding to the painful area c) Symptoms from the patellar tendon for a minimum of 3 months 2. Structural tendon changes and neovascularization corresponding to the painf…	1. Anterior knee pain at palpation of the area between the lower pole of the patella and the patellar tendon 2. Normal patellofemoral joint geometry (plain radiogaphs, including skyline views were undertaken) 3. Confirmed diagnosis by US and MRI: a) Increased tendon volume b) Altered signal of the patellar tendon near the lower pole of the patella at MRI c) Hypoechoic regions corresponding to ten…	1. Clinical diagnosis of patellar tendinopathy a) Self-reported pain b) Palpatory tenderness along the length of the patellar tendon at its proximal insertion directly at the inferior pole of the patella 2. Radiologically bases diagnosis of patellar tendinopathy based on the presence of one or more of the following abnormalities: a) Hypoechoic regions b) Discrete anechoic areas c) Intratendinous …	1. History of knee pain in the patellar tendon or its patellar or tibial insertion in connection with training and competition, and palpation tenderness at the corresponding painful area 2. Symptoms for 3 to 12 months in the current season or in the second half of the previous season (January–May 2008) 3. Age 18 to 35 years of age, to reduce chances of osteochondrotic diseases such as Sinding-Lar…	1. Diagnosed (clinically and by ultrasound and colour Doppler examination) to have chronic painful PT/JK in the proximal patellar tendon	1. Clinical and ultrasound diagnosis of patellar tendinopathy 2. Duration longer than 6 months 3. Failure of nonoperative treatment, including rest, analgesia, acupuncture, and physiotherapy	1. Male 2. 18-35 years old 3. Physically active (training/competition >3 d/w) 4. Chronic patellar tendinopathy diagnosis (lasting for a minimum period of 6 wk, uni- or bilateral)	Inclusion criteria PRP group 1. History (>3 months) of exercise-associated pain 2. Pain or tenderness on palpation 3. Imaging findings of degenerative changes For this group we enrolled only patients who had failed previous nonsurgical or surgical treatments, including all or a combination of rest for at least two months, conventional stretching exercises and strengthening, and were classified as…	1. History of knee pain in the patellar tendon or its patellar or tibial insertion (pointed out in an anatomical drawing of the knee) in connection with training and competition 2. Symptoms for over three months in the actual season or in the second half of the previous season (January-May 2008) (to exclude acute inflammatory tendon problems and de novo partial ruptures) 3. Age 18-35 years (to re…	1. Characteristic history of pain in the patellar tendon or its patellar or tibial insertions for at least 3 months 2. Increasing with loading 3. Tenderness to palpation in the painful area	1. Confirmed diagnosis by physician: a) Confirmation by ultrasonography b) Local anterior-posterior (AP) thickening of the tendon of at least 1 mm compared with the mid-tendon level c) A Hypo-echoic area and presence of a color Doppler signal within the hypo-echoic area 2. Pain duration of > 3 months	1. Patients with patellar tendonitis, corresponding to ‘‘jumper’s knee’’ as defined by Anglo-Saxon authors	1. Patients with unilateral sub-acute (from 1 to 3 months) or chronic (more than 3 months) patellar tendon pain	1. Aged ≥18 yrs 2. Knee pain on at least one of jumping/landing, running or changing directions 3. Pain on palpation of the patellar tendon 4. Score of <80 points on the Victorian Institute of Sport Assessment (VISA) scale 5. Symptoms sufficient to affect exercise and activity for at least 6 months 6. A confirmed hypoechoic lesion within the patellar tendon on ultrasonography	1. Aged between 18 and 65 2. Diagnosed with patellar tendinopathy for at least 3 months before receiving the injection 3. Unsuccessfully undergone a programme of eccentric rehabilitation under the guidance of a chartered physiotherapist 4. Neo-vascularization at power Doppler ultrasound	1. Jumper's knee diagnosis since at least 3 months, with pain not responding to conservative treatment A diagnosis of patellar tendinopathy was made on the basis of the patient's history and physical examination. All patients underwent clinical and instrumental diagnosis (ultrasonography, magnetic resonance imaging and X-rays in standard projections), in order to identify presence, location and s…	1. Patients with proximal patellar tendinosis	1. A characteristic history of patellar tendinopathy continuously for at least 3 months, or recurrent for at least 6 months 2. Verification of patellar tendinosis using either Magnetic Resonance Imaging (MRI) or Ultrasonography (US)	1. Diagnosis of chronic patellar tendinopathy established by medical history and physical examination 2. Experience pain of 5.0 or greater on a 0-to-10 visual analog scale while walking up and down stairs 3. Patients who understood and complied with the nature of the study participation 4. Age 21 years and older and skeletally matured 5. Physically and mentally competent to sign the informed cons…	1. Clinical diagnosis of jumper's knee 2. Neovascularization corresponding to the painful area 3. VISA-P score < 75 points 4. Between 18 and 40 years old 5. Resident of Norway 6. Able to understand oral and written Norwegian	1. A history of exercise related pain in the proximal part of the patellar tendon or the patellar insertion 2. Tenderness to palpation corresponding to the painful area 3. A clinical diagnosis of jumper's knee as well as grade-IIIB symptoms on the scale originally described by Blazine et al. and later modified bt Lian et al. (that is, the patient had to have pain during and after activity and had…	1. Pain in the proximal patellar tendon during or after patellar tendon loading activity 2. Tenderness in the proximal patellar tendon during palpation 3. Structural tendon changes together with neovascularisation in the proximal patellar tendon at US and colour Doppler examination	1. History of pain in the quadriceps or patellar tendons or their patellar or tibial insertions (localized on a knee map) in connection with training or competition 2. Tenderness to palpation corresponding to the painful area. 3. Patellar tendinopathy symptoms present for a minimum of 3 months 4. Victorian Institute of Sport Assessment (VISA) score less than 80 points 5. Age between 18 and 35 yea…
Exclusion criteria	1. Patients displaying abnormal signal intensity indicating partial rupture of the proximal patellar tendon 2. Concomitant intra- or extra-articular knee joint pathologies 3. Impairment of sports performance and/or sports cessation for reasons other than symptomatic PT (e.g. secondary injuries of the affected extremity) 4. Incompliance 5. Use of doping agents	1. Existence of other knee pathology 2. Previous patellar tendon rupture 3. Previous patellar tendon surgery 4. Inflammatory disorders 5. Metabolic bone diseases 6. Type II diabetes 7. Use of fluroquinolones or corticosteroids in the last 12 months 8. Known familial hypercholesterolemia and fibromyalgia	1. Acute knee or acute patellar tendon injury, chronic inflammatory joint diseases (rheumatoid arthritis) or signs or symptoms of other (co-) existing knee pathologies 2. Using immunosuppressive or corticosteroid medication in the last 6 months 3. Previous knee surgery (on the anterior cruciate ligament or the patellar tendon) 4. A local (corticosteroid) injection of the knee in the past month 5.…	1. Prior knee surgery 2. Associated lower limb injuries (like an anterior cruciate ligament injury or meniscopathy) 3. Having received local steroid injections in the tendon prior to the study 4. Patients who took fluoroquinolones, anticoagulants or anti-inflammatory drugs	1. Acute knee or patellar tendon problems 2. Chronic joint disease(s) 3. Signs or symptoms of other knee pathologies (including surgery) 4. Inability to perform the tests	1. Existence of other knee pathology 2. Previous patellar tendon surgery 3. Inflammatory disorders 4. Metabolic bone diseases 5. Type II diabetes 6. Use of fluroquinolones or corticosteroids in the last 12 months 7. Known familial hypercholesterolemia 8. Chronic pain conditions	1. Bone conflict or bone edema	1. Steroid injection within 3 months 2. Previous allergic reaction to local anesthetic or corticosteroid 3. Possible local sepsis 4. Concomitant anticoagulant therapy 5. Peripheral vascular disease 6. Age younger than 18 years	1. Contraindications to the use of dexamethasone or iontophoresis 2. Lower extremity surgery within the past 6 months 3. A confounding diagnosis of the lower extremity 4. Corticosteroid treatment within the past 2 months 5. Current use of prescription or over-the-counter pain medication 6. Signs of inflammation associated with acute tendinitis.	Not described	1. Benefited from any treatment during the last month before infiltration of PRP 2. Platelet concentration in blood below 1.5x105/µL 3. Anterior traumatic knee injuries 4. Anterior lower limb muscle injuries 5. Symptomatic patellar syndrome (n=7)	1. Coexisting knee lesions 2. Knee surgery or corticosteroid injection in the previous 3 months	1. Chronic articular disease 2. Concomitant knee pathology (e.g. cruciate ligament injury of meniscal tear) 3. Contraindications of EPI technique (i.e. pregnancy, knee prosthesis, osteosynthesis, cardiac disease, malign tumour or coagulopathy) 4. Concomitant administration of drug (i.e. fluoroquinolones, anticoagulants, corticosteroids or non-steroidal anti-inflammatory	1. Acute knee or patellar tendon injuries 2. Chronic joint diseases and other coexisting knee pathology 3. Knee surgery or injection therapy in the preceding 3 months 4. Daily use of drugs with a putative effect on patellar tendinopathy (e.g. non-steroid anti-inflammatory drugs) 5. Use of anticoagulants	1. Previous tendon surgery in either tendon 2. Patients with additional knee injury (meniscal tears, osteochondral injuries, ligament insufficiency reconstruction) 3. Calcific tendinopathy 4. Patellofemoral degenerative joint disease 5. Symptomatic patellar instability 6. A Q angle > 20°, a genu valgus > 7°, trochlear angle > 145° at the skyline view, patellar dysplasia 4° and 5° according to the…	1. Systemic disorders 2. Diabetes 3. Rheumatoid arthritis 4. Infections 5. Coagulopathies 6. Immunodepression 7. Hemoglobin values of <11 g/dL 8. Platelet values of <150,000/mm3 9. Therapy with antiaggregants, anticoagulants, and NSAIDs in the 10 days before the procedure	1. Previous injection or surgery in the affected knee 2. Inability to complete patientreported outcome surveys	1. Acute knee or patellar tendon injuries 2. Chronic joint diseases 3. Signs or symptoms of other coexisting knee pathology 4. Pregnancy 5. Bleeding disorders and haematological diseases 6. Malignancy 7. Knee surgery 8.Injection of any kind in the patellar tendon in the preceding three months 9. Use of NSAIDs in the last 5 days before or first 6 weeks after injection or daily use of drugs with a …	1.Bilateral complaints 2. Signs or symptoms of other, coexisting knee lesions 3. Knee surgery or injection therapy with corticosteroids in the past 3 months 4. Systemic disorders such as diabetes, rheumatoid arthritis, coagulopathies, cardiovascular diseases, infections, immunodepression, or neoplastic diseases 5. Therapy with anticoagulants-antiaggregants 6. Platelet values of fewer than 150,000…	1. Rheumatoid arthritis 2. Generalized polyarthritis 3. Local infection 4. Pregnancy 5. Tumours 6. Age <18 years 7. End stage ipsilateral knee osteoarthritis (defined as severe knee joint space narrowing, joint sclerosis, and periarticular osteophytes) 8. Prior patellar tendon surgery 9. Previous fractures to the knee	1. Duration >24 months 2. VISA-P score of 80 or more 3. Previous surgery or a local (corticosteroid) injection of the knee 4. Previous performance of a complete heavy-load eccentric exercise programme of the knee in the last 2 years or inability to perform it because of serious illness 5. Current pregnancy or other contra-indication for GTN-use	Not described	Not described	1. History of trauma to the knee 2. Other current knee or lower extremity problems including anterior knee pain, muscle strains and hip or ankle injuries	Not described	1. Systemic disorders such as diabetes, rheumatoid arthritis, coagulopathies, cardiovascular diseases, infections, immunodepression, patients in therapy with anticoagulants, and use of NSAIDs in the five days before bone marrow aspiration	Not described	Not described	Not described	1. Acute knee injuries or other coexisting knee disorders 2. Long-term nonsteroidal anti-inflammatory drug treatment 3.Use of fluoroquinolones 4. Knee surgery or injection therapy with corticosteroids in the preceding 3 months 5. Contraindications for ESWT treatment (pregnancy, malignancy, use of anticoagulants, coagulopathy)	Not described	1. Previous injectable treatment 2. Previous surgery 3. Bleeding diasthesis 4. Known allergies	1. Other knee injuries (e.g., ligament rupture, meniscus or cartilage damage) 2. Any knee surgery 3. Subjects undergoing invasive treatment or using orthotics 4. Other exclusion factors, e.g., systemic, cardiac and/or respiratory diseases and neuromuscular disorders (e.g., Parkinson’s disease, multiple sclerosis, stroke or peripheral neuropathy)	1. Systemic disorders such as diabetes 2. Rheumatoid arthritis 3. Coagulopathies 4. Cardiovascular diseases 5. Infections 6. Immunodepression 7. Patients in therapy with anticoagulants–antiaggregants 8. Use of NSAIDs in the five days before blood donation 9. Hb values of <11 10. Platelets values of <150,000/mmc	1. Acute knee or acute patellar tendon injuries 2. Chronic joint diseases 3. Signs or symptoms of other (co-)existing knee pathologies 4. Athletes who use drugs with a putative effect on patellar tendinopathy in the last year on daily basis (e.g. non-steroid anti-inflammatory drugs, fluorquinolones) 5. Use of anticoagulants 6. Athletes who had knee surgery or injection therapy with corticosteroid…	1. Age younger than 18 years old 2. Other concomitant treatments (e.g., physiotherapy) 3. Regular use of NSAID 4. Other knee disorders or previous knee surgery 5. Lumbar disc disease or neurological abnormalities 6. Coagulation disorders 7. Use of anticoagulants	1. Corticosteroid injections within 12 months 2. Previous knee surgery 3. Arthritis 4. Diabetes 5. Any confounding diagnosis to the knee joint	Not described	1. Clinical signs of acute joint inflammation (oedema, heat, and rubor) 2. Meniscopathy 3. Advanced degenerative osteoarthritis, as evidenced by MRI and X-rays	1. Clinical signs and symptoms of a knee pathology other than PT (including co-existing pathologies) 2. Previous patellar tendon surgery 3. Injection into the knee in the previous 6 months	1. Operated on patellar tendon 2. Concurrent musculoskeletal knee problems 3. Suffered a complete or partial tear of their patellar tendon	1. Physical therapy in the 4 weeks prior to ESWT 2. Non steroidal, anti-inflammatory medication in previous week 3. Polineuropathie 4. Gonarthrosis 5. Patellofemoral chondromalacia 6. Previous surgical treatments of the knee affected by patellar tendinopathy	1. Presence of multiple focal areas of calcification within the proximal tendon 2. Previous surgery	1. A history of a local corticosteroid injection during the last three months 2. Previous anterior cruciate ligament injury or reconstruction 3. Diabetes 4. Chronic inflammatory or rheumatic joint disease 5. Back pain during the last three months	1. Patients who received a cortisone injection within 6 weeks 2. Patients on immunosuppressant agents and/or corticosteroid within 6 months 3. Patients with diabetes mellitus, occlusive vascular disease, collagen disease, osteoarthritis or rheumatoid arthritis, coagulopathy, or infection 4. Patients with radiographic fractures around the knee 5. Patients with cardiac arrhythmia or cardiac pacemak…	1. A history of knee problems caused by patellofemoral pain syndrome, inflammatory joint conditions, or degenerative conditions	1. A history of knee or patellar tendon surgery 2. An inflammatory or degenerative joint condition	1. A history of patellofemoral pain 2. Surgical treatment of the patellar tendon 3.knee arthrosis	1. History of knee problems caused by patellofemoral pain syndrome 2. Inflammatory joint conditions 3. Degenerative conditions
Participants included	n=28 (30 tendons)	n=20	n=52	n=64	n=97	n=29	n=20	n=22	n=31	n=6	n=22	n=40	n=40	n=43 (57 tendons)	n=46	n=28	n=23	n=5	n=46	n=66	n=33	n=36	n=50	n=43	n=101 (120 tendons)	n=8	n=33 (43 tendons)	n=64 (73 knees)	n=47	n=62	n=45 (52 tendons)	n=46 (60 tendons)	n=10	n=31	n=62	n=19	n=39	n=64	n=18	n=37	n=9	n=73 (83 tendons)	n=44 (47 knees)	n=20	n=50 (54 knees)	n=33 (42 tendons)	n=35 (40 tendons)	n=15 (19 tendons)	n=29
Experimental conditions	1. Arthroscopic patellar release (APR)	1. 4-week isotonic exercise program (n=10) 2. 4-week isometric exercise program (n=10)	1. 3 sessions at 1-week intervals of ESWT (n=22) 2. 3 sessions at 1-week intervals of sham shockwave (n=30)	1. Conventional electrophysiotherapy sessions of 50 min for three days a week over 8 weeks + standardized eccentric exercise program (n=32) 2. Ultrasound-guided galvanic electrolysis technique (USGET) every two weeks + standardized eccentric exercise program (n=32)	Part 1 (n=97): All participants performed during one session three functional tests (a single-leg decline squat, the vertical jump test and the triple hop test) under four conditions: no intervention (control), patellar strap, sports tape and placebo Part 2 (n=69): 1. No intervention (control) (n=14) 2. Patellar strap during sports activities (n=21) 3. Sports tape during sports activities (n=18) …	1. 4-week isometric exercise program (n=13) 2. 4-week isotonic exercise program (n=16)	1. One infiltration of PRP (n=10) 2. Two infiltrations of PRP (one-week interval) (n=10)	1. Autologous blood injection (n=11) 2. Saline injection (n=11)	1. Wireless iontophoresis (n=11) 2. Wireless iontophoresis patch (n=10) 3. Sham treatment (n=10)	1. A bout of isometric and isotonic muscle contractions	1. Six millilitres of PRP were injected without local anaesthetic. One week after infiltration, patients started a standardised sub-maximal eccentric reeducation	1. A single PRP injection (n=20) 2. Two PRP injections two weeks apart (n=20)	1. 3 months of ultrasound guided intratissue percutaneous electrolysis (EPI) and eccentric exercise After the first EPI treatment, the patients underwent consecutive sessions of EPI every 2 weeks and 2 weekly sessions of an eccentric exercise training using the resistance isoinertial leg-press machine	1. Three sessions of FSWT + eccentric training programme (n=21, 31 tendons) 2. Three sessions of RSWT + eccentric training programme (n=22, 26 tendons)	1. Open surgery	1. US-guided pure PRP injections into the site of the tendinopathy (3 consecutive injections 1 week apart)	1. Ultrasound-guided dry needling alone (n=13) 2. Ultrasound-guided dry needling with injection of leukocyte-rich PRP (n=10)	1. ultrasound-guided PRP injection in the degenerative zone of the patellar tendon followed by a physical therapy program	1. 2 autologous PRP injections over 2 weeks under ultrasound guidance (n=23) 2. 3 sessions of focused extracorporeal shock wave therapy (ESWT) (n=23)	1. A single application of radial SWT (n=33) 2. Control group (n=33)	1. 12-week eccentric training programme + glyceryl trinitrate (GTN) patch (n=16) 2. 12-week eccentric training programme + placebo patch (n=17)	1. Platelet rich plasma injection (PRP)	1. Injection(s) of hyaluronan (average of 2.0 injections per case (range 1-11))	1. 4 weeks of eccentric training and static stretching exercises (n=22) 2. 4 weeks of eccentric training (n=21)	1. Ultrasound-guided sclerosing injections (up to a maximum of 5 injections at 4- to 6-week intervals) (n=101, 120 tendons)	1. Inoculation of bone marrow mononuclear cells (BM-MNCs)	1. Ultrasound-guided sclerosing injections using polidocanol (n=33, 43 tendons)	1. Arthroscopic debridement of the adipose tissue of the Hoffa’s body posterior to the patellar tendon, debridement of abnormal patellar tendon, and excision of the lower pole of the patella	1. Ultrasound-guided injection of 25% dextrose with lidocaine	1. 3 ESWT treatments 1-week intervals (n=31) 2. 3 sham ESWT (placebo) treatments 1-week intervals (n=31)	1. Treatment with sclerosing polidocanol injections (A maximum of three injection treatments (at least 6 weeks in between) were given before evaluation) (n=26) 2. Treatment with arthroscopic shaving (n=26)	1. Injection with laboratory-prepared, amplified collagen-producing cells derived from dermal fibroblasts and suspended in autologous plasma from centrifuged autologous whole blood (33 tendons) 2. Injection with autologous plasma alone (27 tendons)	1.6-week training program employing a leg press flywheel ergometer	1. Multiple platelet-rich plasma (PRP) injections on three occasions two weeks apart into the site of patellar tendinopathy(n=15) 2. Control group (n=16)	1. Three ESWT treatments 2. Three placebo treatments	1. 3 patient guided focused medium to high energy ESWT treatments at a weekly interval	1. 2 ultrasound-guided (gray scale) injections of 1 mL of 40 mg/mL methylprednisolon in 0.5 mLlidocain (1%) into the peritendinous tissue posterior to thehypoechoic area of the patellar tendon (4-week interval) (n=13) 2. Three sets of 15 slow repetitions of eccentric unilateral squats on a 25° decline board twice daily (morning and evening) for 12 consecutive weeks (ECC) (n=13) 3. Three weekly se…	1. Open surgery (n=54) 2. Arthroscopy (n=10)	1. Fascial Manipulation	1. Active-LIPUS self-administered by participants for 20 min/day, 7 days/week for 12 weeks + daily standardized eccentric exercises (single-legged squats on a decline board (3 sets of 15 repetitions)) (n=17) 2. Inactive-LIPUS (placebo) self-administered by participants for 20 min/day, 7 days/week for 12 weeks + daily standardized eccentric exercises (single-legged squats on a decline board (3 set…	1. Undergone HVIGI	1. Average of 4 sessions (minimum 3, maximum 5) of ESWT at a 2/7-day interval	1. Ultrasound guided dry needling and injection of autologous blood into the site of patellar tendinosis	1. A 12-week period with bilateral eccentric overload strength training using the Bromsman® device twice a week (n=11) 2. A 12-week period of unilateral eccentric body load training using a decline board twice a week (n=9)	1. Single session of extracorporeal shockwave (n=27, 30 knees) 2. Conservative treatments including nonsteroidal anti-inflammatory drugs, physiotherapy, exercise program, and the use of a knee strap (control group) (n=23, 24 knees)	1. Polidocanol injection(s) (n=17, 23 knees) 2. Control group (lidocaine with adrenaline) (n=16, 20 knees)	1. Surgical treatment (the abnormal tissue was removed by means of a wedge-shaped full-thickness excision, followed by a structured rehabilitation program with gradual progression to eccentric training) (n=20) 2. 12-week eccentric training program on a 25° decline board (each training session was to be completed twice daily, with three sets of fifteen repetitions being performed at each session) …	1. Concentric training while standing on a decline board (n=9) 2. Eccentric training while standing on a decline board (n=10) The training programme consisted of three sets of 15 repetitions each, performed twice a day, 7 days a week, for 12 weeks	1. Squats on a 25 degrees decline board as a home exercise program (3 x 15 repetitions twice daily) for a 12-week intervention period (n=13) 2. Control group (n=16)
Recruited from	All patients were referred to our institution for operative treatment due to failed conservative treatment	Female volleyball and basketball athletes aged more than 16 years were recruited from subelite and elite competitions	A digital letter was sent to potential referring physicians and physical therapists to inform them about the study. They were asked to refer eligible participants to the sports medicine departments of the UMCU or MCH	Selected from the outpatient clinic	Participants were recruited from sports medicine departments and physical therapy practices and through advertisements on websites of regional sports clubs and sports federations, and by using social media	Players from Victorian volleyball leagues and basketball leagues who played or trained at least three times per week were approached at their game or training venue	Not decribed	Recruited from referrals received at the Homerton University Hospital Sports and Musculoskeletal Medicine Clinic and the Musculoskeletal Injection Clinic	Recruited from 2 orthopaedic physical therapy clinics over a 32-month period (June 2011–January 2014)	Six male volleyball athletes who were taking no medication were recruited for the study	Potential subjects were identified among patients who were consulting our Sports Traumatology Department	Patients were recruited from December 2009 to January 2012. During this time period, 242 patients were treated in our institution by autologous PRP injection for different tendinopathies. Fifty of them (20.6%) suffered from proximal patellar tendinopathy and were assessed for eligibility	Not described	Subjects who visited the Sports Medicine Center of University Medical Center Groningen and were diagnosed there with patellar tendinopathy by experienced sports medicine specialists and were asked to participate in the study	All patients were secondary and tertiary referrals from other health-care professionals	Not described	30 consecutive patients from the sports medicine clinic were assessed for eligibility	The participants were all patients of the Sports Medical Center of University Medical Center Groningen	46 patients who had consulted one of the participating physicians for jumper’s knee during the period from January 2009 to May 2011	Patients with chronic patellar tendinopathy who had undergone shock wave therapy at our institution between March 2008 and April 2009	The double-centre study was announced to general practitioners, sports medicine physicians, physiotherapists and the general public with advertisements on the hospital website and a folder. All patients who visited the outpatient department and who matched the criteria and were willing to participate in the study were included	Not described	Patients treated in Tokyo Medical and Dental University Hospital from January 1999 to December 2006	Private outpatient physiotherapy clinic located in Athens	This prospective study recruited patients from 2 clinics: 1 private sports medicine clinic and 1 public hospital	Not described	33 elite athletes were recruited. The team sport athletes competed in the top 2 divisions of the respective Norwegian league, and in the individual sports, the athletes represented a comparable level.	Patients managed with patellar tendinopathy in from 1998-2008 in our center	Participants in the study were referred from August 2003 to February 2009 by board-certified sports medicine specialists in the local Vancouver area after failing standard-of-care therapy	Recruitment of participants for the TOPGAME study took place in May through November 2008 and was facilitated by the Dutch basketball, handball, and volleyball associations, who sent a generic informative e-mail to all their registered athletes (age 18-35 years). Additional attention was also drawn to the TOPGAME study through advertisements in newspapers and Web sites and at tournaments	All were patients referred to the Capio Artro Clinic in Stockholm, with the diagnosis PT/ JK	Referred for assessment	Recruited from the greater Barcelona region	Not described	Recruitment of the participants is facilitated by the Dutch Basketball Association (Nederlandse Basketbalbond, NBB), Dutch Handball Association (Nederlands Handbalverbond, NHV) and the Dutch Volleyball Association (Nederlandse Volleybalbond, NEVOBO). Through both an advertisement on their website and an e-mail sent to all their athletes (aged 18-35) and the coaches of the club teams, attention is…	Outpatient sports medicine clinic at the University Medical Center Groningen in the Netherland	Self-selection following advertisment	The series included 20 cases operated on at the Hôpital de la Pitié-Salpétrière, 20 cases at the Clinique Juge in Marseille, 23 in the Centre Médicochirurgical Paris V and one case in the Polyclinique des Alpes du Sud	Not described	Advertisements in local media, sporting clubs, university staff and students, and sports medicine clinics	Patients suffering from patellar tendinopathy who had undergone HVIGI treatment at a private hospital in London	Not described	Not decribed	Contacting colleague physicians and physiotherapists	Some patients were initially treated at another institution and subsequently referred to our hospital, whereas others came to our outpatient clinic at the onset of symptoms	Clubs and players in the elite division in basketball, team handball, and volleyball for both male and female players in the southern part of Norway were contacted toward the end of the competitive season (mid-March) with an invitation to take part in a clinical screening examination	Physicians and physical therapists in the Oslo region were informed of the purposes and procedures of the study by mail and were asked to refer patients who fulfilled the inclusion criteria to the Health Department at the Olympic Training Center	Patients referred to the Sports Medicine Unit in Umea	Clubs in the elite and 1st divisions for men and women in Norway
Baseline characteristics	-4 females, 24 males -Competitive athletes -Mean age: 28.2 years (range, 18-49 years) -Sports, n Running: 10 Soccer: 8 Handball: 4 Alpine skiing: 3 Cycling: 2 Body building: 1	Isotonic group -Bilateral symptoms: 5 -9 men, 1 female -SLDS (median+range): 5/10 (1-8) -VISA-P (0-100) median + range: 69.5 (46-83) -Starting weight (mean ± SD), kg: 29.5 ± 9.88 Isometric group (n=10) -Bilateral symptoms: 3 -9 men, 1 female -SLDS (median+range): 5/10 (2-8) -VISA-P (0-100) median + range: 72.5 (13-88) -Starting weight (mean ± SD), kg: 29.5 ± 9.59	-Mean (± SD (range)) age, yrs: 28.6 ± 6.7 (18-45) -Male: 73.1% -Mean BMI: 23.6 ± (18.1-32.3) -Mean (± SD (range)) hours of sports per week: 4.3 ± 3.2 (0-16) -Mean (± SD (range)) VISA-P: 57.1 ± 14.9 (20-80) -Mean (± SD (range)) duration of symptoms in weeks: 84.9 ± 107.4 (12-500)	Conventional electrophysiotherapy group -Mean (SD) age (years): 30.9 (5.9) -Male: female: 24:8 -Mean (SD) weight (kg): 71.5 (11.2) -Mean (SD) height (m): 174.7 (7.4) -Mean (SD) BMI (kg/m2): 23.3 (2.1) -Mean (SD) physical activity (days/week): 3.8 (1) -Mean (SD) physical activity (hours/day): 1.9 (1.5) -Laterality (right:left): 24:8 -Mean (SD) symptoms duration (months): 29.5 (31.5) -Mean (SD) # o…	-Mean (SD) age (years): 27.0 (8.1) -Gender (male/female): 59/38 -Mean (SD) BMI (kg/m2): 23.5 (3.2) -Knee PT (left/right/both): 23/29/45 -Mean (SD) VISA-P (0-100): 58.5 (12.7) -Median (interquartile range) PT duration (months): 18.0 (27.0) -Pain location (proximal/midtendon/distal): 78/7/7 -Playing level (reg/nat): 77/20 -Mean (SD) sport (hours per week): 4.5 (2.2)	-Age, year mean ± SD (range): 23.0 ± 4.7 (16-30) -Sex (male/female): 27/2 -Duration of symptoms, months mean ± SD (range): 35.8 ± 33.8 (1-120) -BMI, kg/m2 mean ± SD (range): 24.0 ± 3.0 (18.9-34.7) -Unilateral/bilateral symptoms: 13/16	One infiltration of PRP group -Age: 31.1 ± 10.4 years -Duration of symptoms: 17.2 ± 7.4 months Two infiltrations of PRP group -Age: 29.5 ± 5.87 years -Duration of symptoms: 16.9 ± 8.1 months	Autologous blood injection group -Mean (SD) age: 38.910 (8.860) -Mean (SD) duration symptoms, mo: 16.727 (9.655) -Mean (SD) tendon grade (neovascularity): 2.910 (0.302) Saline injections group -Mean (SD) age: 42.455 (12.925) -Mean (SD) duration symptoms, mo: 19.181 (12.156) -Mean (SD) tendon grade (neovascularity): 2.546 (0.688)	Wireless Patch group -Age,y: 26.5 ± 6.1 -Height, cm: 172.2 ± 7.3 -Mass, kg: 68.9 ± 11.1 -Activity level, 7-point Likert scale: 5.6 ± 1.5 Wired Dose Controller group -Age,y: 26.0 ± 2.2 -Height, cm: 177.2 ± 8.4 -Mass, kg: 80.1 ± 9.5 -Activity level, 7-point Likert scale: 5.2 ± 0.9 Sham group -Age,y: 26.0 ± 7.4 -Height, cm: 176.1 ± 7.2 -Mass, kg: 73.3 ± 5.6 -Activity level, 7-point Likert scale: 5.6…	-Median age: 26.9 years, range 18-40 -Mean VISA-P: 52.8 (47.5 to 66.5)	-Male/female: 19/3 -Mean age: 28.8 years -Mean (range) duration of symptoms: 17.6 months (4-62) -Sports, n Soccer: 8 Jogging: 4 Basketball: 3 Karate: 3 Volleyball: 2 Tennis: 2 Judo: 2 Mountain biking: 2 Boxing: 1	Single PRP injection group -Age, y, mean (SD): 24.6 (3.4) -Sex ratio (M/F): 14/2 -Delay before injection, mo, mean (SD): 4.9 (1.3) -Elite athletes, n: 9 -Competitive non-elite athletes, n: 7 Two PRP injections group -Age, y, mean (SD): 24.1 (3.3) -Sex ratio (M/F): 12/2 -Delay before injection, mo, mean (SD): 4.4 (1.06) -Elite athletes, n: 8 -Competitive non-elite athletes, n: 6	According to VISA-P score at baseline, patients were dichotomized into group 1 (<50 points) and group 2 (≥50 points) Group 1 (n=21) -Mean ± SD age (years): 26.0 ± 8.48 -Gender % (n) Male: 81.0 (17) Female: 19.0 (4) -Dominant extremity % (n) Right: 81.0 (17) Left: 19.0 (4) -Injured knee % (n) Right: 38.1 (8) Left: 47.6 (10) Bilateral: 14.3 (3) -Mean ± SD baseline VISA-P: 32.5 ± 12 Group 2 (n=19) -…	-Age (years): 31.1 ± 10.7 -Men/women: 32/11 -Height (cm): 181.3 ± 8.6 -Weight (kg): 79.4 ± 13.2 -BMI: 24.1 ± 3.2 -Training h/wk: 2.5 ± 3.2 -Playing and training load compared to before injury, same load/reduced load: 8/35 -Duration of symptoms (in months for all tendons): 35.2 ± 43.5 -Unilateral/bilateral: 29/14 -Location of pain (proximal/mid-tendon/distal): 53/0/4	Bilateral group -23 athletes -Average age (SD): 29.1 years (11.4), range 18-45 -Average symptom duration: 9.3 months Unilateral group -23 athletes -Average age (SD): 29.1 years (11.4), range 18-45 -Average symptom duration: 8.9 months	-Age, y, mean (range): 27.3 (16.3-36.8) -Height, cm, mean (range): 184 (160-218) -Weight, kg, mean (range): 72 (50-120) -BMI, kg/m2, mean (range): 21.6 (18.9-33.2) -Duration of symptoms, mo, mean (range): 18 (4-60) -Type of sport, n Jumper: 19 Other: 9 -Hours of training per week, mean (range): 18 (8-24) -Level of sport, n Professional: 17 Semiprofessional: 11 -Patellar tendinopathy grade, n 3A: …	-Mean ± SD age: 35 ± 13 years -Male: 95% -Mean ± SD height: 69 ± 4 in. -Mean ± SD weight: 177 ± 28 lbs -Mean ± SD baseline scores VISA: 43.7 ± 15.6 Tegner: 3.9 ± 2.2 Lysholm: 53.6 ± 16.0 VAS: 3.5 ± 2.0 SF-12: 49.6 ± 5.8	-2 men, 3 women -Mean age: 27 (23-31) -Mean BMI: 25.7 -Sport, n Soccer: 2 Volleyball: 2 Handball: 1 -Mean hours sport participation per week (pre injury): 5.4 (2.9-7.9) -Mean duration of symptoms: 38.4 (13.4-63.4) months -Mean VISA-P baseline: 49.3 (36.0-62.5)	PRP injection group -Age, mean (SD), y: 26.9 (9.1) -Men/women, n: 20/3 -Duration of symptoms, mean (SD), mo: 18.9 (19.1) -Affected knee, n left/right: 12/11 -Previous treatments, n (%) CO2 laser therapy: 8 (34.8) Tecar therapy: 19 (82.6) Therapeutic ultrasound: 3 (13.0) Therapeutic exercises: 21 (91.3) NSAIDs: 9 (39.1) -Sport activity, n (%) Elite athletes: 18 (78.3) Nonelite athletes: 5 (21.7) -…	-No intergroup differences in mean age (p = n.s.) or duration of symptoms (p = n.s.) -Nineteen patients in the SWT and 16 patients in the control group practised regularly recreational sports (noncompetitive exercise 3–5 times per week). Nine patients in the SWT group and 11 control patients undertook heavy physical work (i.e. they were heavy factory workers or manual labourers or in occupations …	-Mean ± SD age (years): 32.9 ± 10.0 -Sex (men/women): 25/8 -Mean ± SD height (m): 180.9 ± 9.1 -Mean ± SD mass (kg): 81.6 ± 13.6 -Mean ± SD training hours (h/week): 4.1 ± 4.4 -Mean ± SD VISA-P at baseline: 65.5 ± 13.8 -Mean ± SD VAS during sports at baseline: 5.0 ± 3.1 -Mean ± SD duration of symptoms (weeks): 48 ± 37 -Unilateral/bilateral symptoms: 23/10	-Gender (men/women): 23 (63.9%)/13 (36.1%) -Age (mean ± SD): 30.9 ± 12.6 -Cortisone (yes/no): 13 (36.1%)/23 (63.9%) -Ethoxysclerol (yes/no): 6 (16.7%)/30 (83.3%) -Surgical treatment (yes/no): 5 (13.9%)/31 (86.1%) -Duration of complaints in months (mean ± SD): 40.3 ± 28.4 -Baseline VAS ADL score (mean ± SD): 4.0 ± 2.7 -Baseline VAS work score (mean ± SD): 3.6 ± 3.9 -Baseline VAS sport score (mean …	-33 females, 17 males -Average age: 26.4 years old (range 17-54) -Athletic level, n Semiprofessional: 28 Competitive: 11 Recreational: 12	Eccentric training and static stretching exercises group -16 men/6 women -Mean (SD) age: 26.38 (4.32) years -Duration of patellar tendinopathy: 5.985 months Eccentric training (group) -15 men/6 women -Mean (SD) age: 27.04 (5.11) years -Duration of patellar tendinopathy: 6.126 months	-Mean ± SD (range) age, y: 27 ± 10 (17-58) -Mean ± SD (range) height, cm: 182 ± 7 (165-197) -Mean ± SD (range) weight, kg: 81 ± 11 (58-110) -No. of female/male patients: 15/86 -No. of bilateral symptoms: 19 -Mean ± SD (range) duration of symptoms, mo: 17 ± 22 (3-180) -Mean ± SD (range) total amount of training, h/wk: 12.5 ± 5.6 (3-34) -Mean ± SD (range) baseline VISA-P score: 39 ± 17 (2-76)	-Male/Female: 4/4 -Mean age: 24 (range 14-35)	-Male athletes/Female athletes: 28/5 -Mean age: 25 (range 17-42) -Sport, n Handball: 15 Soccer: 6 Basketball: 5	-40 males, 24 females -Average age: 24.6 years (range 16-35) -73 knees (42 right, 31 left) -Condition occuring in dominant limb n:51 -Involved in professional sports, n: 27	-39 men, 6 women -Mean (±SD) age: 38.3 years (±14.3) -Mean (±SD) symptom duration: 21.8 months (±16.6) -Previous treatments, n Eccentric drop-squats: 22 Supervised general physiotherapy: 16 Non-steroidal anti-infl ammatory medication: 9 General exercises for knee extension and for the lower extremity: 8 Extracorporeal shock wave therapy: 4 Foot orthoses: 4 Knee braces: 4 Acupuncture: 2 Chiropract…	-Age, y: 24.9 ± 4.9 -Men/women: 41/21 -Height, cm: 181.6 ± 9.5 -Mass, kg: 79.2 ± 14.3 -Sport, volleyball/basketball/handball: 57/4/1 -Training, h/wk: 3.1 ± 1.6 -VISA-P at baseline: 60.9 ± 12.6 -Duration of symptoms, mo: 7.7 ± 3.7 -Unilateral/bilateral symptoms: 31/31 -Location of pain (only for treated tendons), proximal/midtendon/distal: 56/3/3	Sclerosing injections group -Mean (SD) age, years: 27.0 (7.6) -Mean (SD) duration of symptoms, months: 20.0 (10.4) -Mean (SD) VAS at rest assessment: 37.8 (24.9) -Mean (SD) VAS at activity at assessment: 69.0 (17.3) Arthroscopy group -Mean (SD) age, years: 26.6 (7.6) -Mean (SD) duration of symptoms, months: 23.8 (15.5) -Mean (SD) VAS at rest assessment: 44.6 (28.4) -Mean (SD) VAS at activity at a…	-41 men, 5 women -14 bilateral, 33 right, 27 left tendons -Mean age: 36 years (range 20-51) -Mean duration of symptoms: 11.1 months (range 6-39)	-Age: 25 ± 6 yr -Height: 178 ± 8 cm -Body mass: 77.5 ± 11 kg -Soccer players, n: 7 -Basketball players, n: 2 -Long distance runner, n: 1 -Unilateral tendinopathy, n: 5 -Bilateral tendinopathy, n: 5 -Duration of pain: 31.7 (6-96) weeks	Platelet-rich plasma (PRP) group -Age: 28.8 ± 8.5 -Sex: Male -Bilateral: 5 -Sports activity level: 7.5 ± 1.6 -Duration of symptoms (mo): 24.1 ± 19.9 -Previous treatments, n Rest (at least 2 mo): 15 Stretching exercises: 15 Strengthening exercises: 15 Ultrasound therapy: 10 Shock wave therapy: 7 Laser therapy: 7 Deep tendon massage: 6 Corticosteroids injections: 1 Sclerotherapy: 1 Surgery: 5 -Pain…	-Age: 18-35 -Symptoms: 3-12 months -Sport, n Volleyball: 57 Handball: 1 Basketball: 4	-19 male athletes -Mean age: 37 (range 20-58) -All participated in sports at recreational level (2-5 hours of athletic activity/wk) -Average duration of symptoms: 28 (± 25.2) months -84% had received two or more previous treatments for patellar tendinopathy -Mean (±SD) VISA-P before treatment: 36.1 (±18.3) -Mean (±SD) VAS before treatment: 7.2 (±1.9)	1. Mean ± SD (range) age (years): 32.4 ± 8.8 (18-53) 2. Mean ± SD (range) height (cm): 183 ± 9 (168-204) 3. Mean ± SD (range) weight (kg): 83.3 ± 11.1 (65.0-107.0) 4. Mean ± SD (range) BMI (kg/m2): 24.7 ± 2.5 (20.5-34.9) 5. Mean ± SD (range) symptom period (months): 18.7±12.3 (3-36) 6. Mean ± SD (range) activity level (h/week): 6.0 ± 3.0 (2-15) 7. Unilateral/bilateral: 26/11 8. Proximal/distal: 3…	-88% men, 12% women -Mean age: 30 (17-59) -45% competitive athletes -Average hours of sports per week: 7 (2-20) -Average duration of symptoms: 36 months (range of two months to 20 years) -Cyclic symptoms: 48%	-13 male, 5 female -Mean age: 29.2 -Mean duration of symptoms: 8.67 months	Active-LIPUS group -Mean (SD) age (yr): 27 (7) -Mean (SD) height (m): 1.79 (0.10) -Mean (SD) mass (kg): 81 (13) -Mean (SD) physical activity (h/wk): 5 (5) -Gender (men:women): 12:5 -Mean (SD) duration of symptoms (yr): 3.4 (3.1) -Unilateral:bilateral symptoms: 10:7 -Dominant:non-dominant leg symptoms: 9:8 -Currently taking NSAIDS (yes:no): 4:13 -Previous corticosteroid injection (yes:no): 2:16 -U…	-Mean age (years): 29 -Mean duration of symptoms before injection (months); 20.7 -Unable to play sports mean (months): 5 -Level of sport, n Professional: 3 Semi-professional: 1 Local club: 2 Recreational: 1 Other: 1 -Mean number of clinicians seen before referral for injection: 2.6	-Male/female: 54/19 -Mean age: 32 (15-69) years -Sport activities Professionals: 18% Amateurs: 56% Practicing sports occassionally, but at least once a week: 26% Jumping athletes (volleyball and basketball players): 54% -Bilateral tendinopathy, n: 10 -Inferior pole of patella affected: 67.5% -Distal insertion on the anterior tuberosity of the tibia affected: 10.8% -Quadriceps tendon affected: 21.…	-40 men, 7 women -Mean age: 34.5 years (range 17-54) -Mean duration of symptoms: 12.9 months (range 1-48) -Mean (SD) pre-procedural VISA score: 39.8 (16.3), range 8-72	Eccentric overload training group -Age: 26 (±8) -Body weight (kg): 78 (±9) -Length (cm): 178 (±5) -BMI: 24.5 (±1.9) -Female/Male ratio: 2/9 -Competitive/recreational athlete: 10/1 One legged standard eccentric training group -Age: 28 (±8) -Body weight (kg): 78 (±5) -Length (cm): 179 (±9) -BMI: 24.1 (±3.7) -Female/Male ratio: 2/7 -Competitive/recreational athlete: 7/2	Extracorporeal shockwave group -Average, age, y: 29.4 ± 10.5 (16-47) -Male/female: 14/13 -Side, right/left: 9/21 -Bilateral knees: 3 -Average duration of disease, mo: 16.2 ± 17.2 (6-64) -Sports participation, n Basketball: 9 Jogging: 2 Weight lifting: 1 Wrestling: 1 Control group -Average, age, y: 30.2 ± 10.4 (16-46) -Male/female: 13/10 -Side, right/left: 5/19 -Bilateral knees: 1 -Average duratio…	Polidocanol injection group -Age, y: 25.4 ± 7.5 (17-42) -Height, cm: 184.7 ± 7.2 (165-202) -Weight, kg: 81.7 ± 9.2 (55-102) -No. of females: 3 -No. of bilateral symptoms: 6 -VISA score: 54 ± 15 (19-78) -Duration of symptoms, mo: 41 ± 37 (4-240) -Total training volume, h/wk: 14.3 ± 5.0 (2.0-28.5) Control group -Age, y: 24.3 ± 4.5 (17-35) -Height, cm: 179.9 ± 9.0 (170-201) -Weight, kg: 80.1 ± 10.2 …	Eccentric training group -Age (yr): 31 ± 8 (19-45) -Height (cm): 180 ± 9 (161-196) -Weight (kg): 81 ± 12 (57-100) -No. of female patients: 2 -VISA score (points): 29 ± 16 (9-57) -Participation in organized sports training (yr): 16 ± 7 (6-28) -Duration of symptoms (mo): 32 ± 28 (6-100) -Specific sport activity training (hr/wk): 7.6 ± 6.4 (0-30) -Weight training (hr/wk): 2.0 ± 2.0 (0-6) -Jump train…	Concentric training group -Age, years: 24.1 ± 6.4 (17-32) -Height, cm: 180.5 ± 4.6 (176-186) -Weight, kg: 79.5 ± 5.3 (71-86) -Duration of symptoms, months: 19.6 ± 20.3 (8-72) -Type of activity, n Running: 2 Soccer: 2 Basketball: 3 Team Handball: 1 -Previous treatment, n Period of rest: 5 NSAID: 3 Physiotherapy: 3 Eccentric training group -Age, years: 25.7 ± 9.9 (17-42) -Height, cm: 176.6 ± 6.6 (1…	Training group -Age (y): 26.8 ± 4.6 (19-35) -Height (cm): 183.9 ± 9.9 (168-198) -Weight (kg): 83.8 ± 7.7 (68-96) -Females: 5/13 -Bilateral symptoms (n): 6 -Duration of symptoms (mo): 67 ± 44 -Quadriceps tendinopathy only (n): 0 -Quadriceps and patellar tendinopathy (n): 2 -Patellar tendinopathy only (n): 11 -Volleybal training (h/wk): 5.8 ± 1.3 -Weight training (h/wk): 1.4 ± 1.5 -Seasons playing …
Outcome measure(s)	1. German version of the VISA-P score (0–100 points) 2. Modified Blazina score according to Ferretti et al. 3. Subjective function of the affected knee by means of single assessment numeric evaluation (SANE) 4. Maximum pain level during activity on a visual analog scale (VAS) 5. Postoperatively, the number of months was quantified until athletes were able to perform specific exercises without any…	Primary outcome 1. Difference in pain (0-10 numerical rating score) during single leg decline squat (SLDS) before and after every intervention session Secondary outcome 1. VISA-P scores	Primary outcome 1. VISA-P scores Secondary outcomes 1. Pain scores during functional knee loading tests, as rated verbally by a NRS for pain on a scale of 0 to 10 2. Satisfaction, rated on a 6-point Likert scale	1. VISA-P scores	1. VAS pain scores	1. Pain during a single leg decline squat (SLDS) scored on a numeric rating scale (NRS) (0-10) (main outcome measure) 2. VISA-P scores 3. Participants were asked about their average tendon pain compared to the beginning of the exercise program on a global rating of change scale from very much worse (−4) to very much better (+4)	1. 10-point Visual Analog Scale (VAS) 2. Clinical examination using a pressure Algometer Commander 3. International Knee Documentation Committee form (IKDC) 4. VISA-P 5. Isokinetic assessment. A VAS score was used to quantify pain resulting from each test 6. One leg counter movement jump (CMJ) and drop jump (DJ) evaluations (two days after isokinetic evaluation). A VAS score was used to quantify …	1. Short-form-Mcgill Pain Questionnaire (SF-MPQ) 2. Visual analog scale (VAS) for pain 3. VISA-P	1. Kujala Anterior Knee Pain Scale 2. Pressure sensitivity measured via an algometer 3. Knee-extension strength measured via a strain-gauge dynamometer 4. Sit-to-stand test	1. PT pain during the single-leg decline squat (SLDS, 0-10) 2. Quadriceps strength on maximal voluntary isometric contraction (MVIC) 3. Measures of corticospinal exictability and inhibition	1. 10-point Visual Analogic Scale (VAS) 2. Clinical examination using a pressure Algometer Commander 3. International Knee Documentation Committee form (IKDC) 4. Victorian Institute of Sport Assessment - Patellar questionnaire (VISA-P) 5. Isokinetic assessment 6. Two days after the isokinetic evaluation, one leg counter movement jump (CMJ) and drop jump (DJ) evaluations were performed using an op…	1. VISA-P score 2. Visual analog scale (VAS) for pain 3. Tegner activity scale	1. VISA-P score 2. Tegner score 3. Blazina's classification	Primary outcome 1. VISA-P scores Secondary outcomes 1. VAS pain score (ranging from 0.0 to 10) during ADL, sport activities and during the decline squat 2. Subjective rating of improvement	1. Anthropometric measures 2. Maximum voluntary contraction 3. VISA-P score 4. Modification of Kelly's criteria (functional outcomes classified from excellent to poor)	1. VISA-P score 2. Visual analog scales (VAS) for pain 3. Lysholm knee scale 4. Tendon healing, assessed with MRI	Primary outcome 1. VISA-P score at 12 weeks Secondary outcomes 1. Visual analog scale (VAS) for pain 2. Tegner activity scale 3. Lysholm knee scale 4. Short Form (SF-12) questionnaire	Primary outcome 1. VISA-P score Secondary outcomes 1. Pain ratings on a VAS during Activities of Daily Living (ADL) 2. Functional tests: 1x single-leg decline swuat, 10x SLDS, maximal jump test and triple-hop test 3. Patients were asked if they had experienced improvement and if they would recommend this treatment to a friend or relative	1. VISA-P score 2. Pain visual analog scale (VAS) 3. Modified Blazina scale	1. VAS 2. VISA-P score 3. Roles and Maudsley (RM) score	Primary outcome 1. VISA-P questionnaire Secondary outcomes 1. Patient satisfaction 2. Pain scores during sports	1. VISA-P score 2. VAS, assessing pain in activities of ADL, during work and sports	1. Modified Roles and Maudsley score	1. Pain and function, using the VISA-P questionnaire 2. Dropout rate	1. VISA-P score	1. Lysholm scoring system 2. Tegner scoring system 3. Cincinnati scoring system 4. Knee injury ad osteoarthritis outcome score (KOOS) 5. Short-form-12 (SF12) 6. Rate overall condition of their knee at the time of the last followup 7. Patients were asked if, based on their experience, they had the same problem in the opposite knee, would they have the same surgery again 8. Ultrasound analysis	Primary outcome 1. Knee function using the VISA-P score Secondary outcome 1. Overall satisfaction with treatment using a visual analog scale	1. International Knee Documentation Committee (IKDC) score 2. Lysholm knee scale 3. VISA-P score	Primary outcome 1. A three-part visual analogue scale (VAS) for pain at rest, activties of daily living (ADL) and during sport Secondary outcomes 1. Segmental ultrasound examinations assessing tendon hypoechogenicity (area and severity score 2. Neovascularity (severity score) 3. The presence or absence of intratendinous tearing and calcification, irregularities of cortical bone and thickness	Primary outcome 1. VISA-P score Secondary outcomes 1. Pain during activities of daily living and sports after functional knee-loading tests rated on a visual analog scale and subjective improvement	1. Pain during patellar tendon loading activity, and at rest, before and after treatment (visual analogue scale; VAS) 2. Self-reported patient satisfaction with the result of the treatment (0-100% satisfaction)	1. VISA-P score, used to assess pain, severity and functional disability 2. Ultrasound, to assess structural and blood flow changes, evaluating 4 criteria: tendon thickness, hypoechogenicty, intrasubstance tears, and neovascularity	1. Maximal voluntary contraction (MVC) test 2. Vertical counter-movement-jump (CMJ) test 3. Maximal force test 4. Clinical measures of pain and tendon function assessed by VAS and VISA-P scores	1. Tegner score 2. EQ VAS score 3. Pain level (1-10 scale) 4. Complications 5. Functional recovery 6. Patient satisfaction	1. VISA-P questionnaire 2. VAS pain 3. Ultrasound	Primary outcome 1. VISA-P questionnaire score (Dutch version) Secondary outcome measures 1. VAS (pain) scores	1. Function and symptoms (VISA-P questionnaire score) 2. Tendon pain during activity (VAS) 3. Treatment satisfaction 4. Tendon swelling 5. Tendon vascularization 6. Tendon mechanical properties 7. Collagen crosslink properties	1. Blazina scale 2. Patellar pain 3. Tendon body pain 4. Pain during stretching and eccentric raising and lowering during a monopodal stance	1. Severity of their pain, as experienced during two specific movement tests, on a VAS scale from 1 to 10	Primary outcome 1. Change in pain during the participant's most aggravating activity in the preceding week, measured on 10-cm visual analogue scales (VAS) for both usual (VAS-U) and worst (VAS-W) tendon pain Secondary outcomes 1. Change on the VISA scale 2. Patient-perceived response to treatment using a 5-point scale 3. Ultrasound and exercise compliance 4. Occurence of adverse treatment effects…	1. A custom-made questionnaire, designed as a short-term outcome measure of pain and function 2. Visual analogue scales 3. VISA-P questionnaire	1. VAS score 2. Subjective clinical evaluation range	1. VISA-P scores 2. Ultrasound examination was done in 21 patients (22 knees)	Primary outcome 1. VISA-P score Secondary outcomes 1. Isokinetic muscle torque 2. Dynamic function 3. Muscle flexibility 4. Pain level, using Visual Analogue Scale (VAS)	1. Pain score 2. VISA score 3. Ultrasonographic examination	Primary outcome 1. Knee function using VISA-P score Secondary outcome 1. Overall satisfaction with treatment using a visual analog scale	Primary outcome 1. Knee function according to the self-reported VISA-P score Secondary outcomes 1. Global evaluation score 2. Treatment satisfaction 3. Functional tests of strength and jumping performance	1. Patient estimation of pain during exercise on visual analogue scales (VAS) 2. VISA-P scores 3. Patient satisfaction	Primary outcome 1. Knee function using VISA score Secondary outcomes 1. Global evaluation score (pain and function) 2. Jumping performance
Measuring moments	1. Preoperative 2. Mean follow-up period 4.2 years (range, 2.2–10.4 years)	1. Baseline 2. End of the program (4 weeks)	1. Baseline 2. 6 weeks after start with ESWT or sham-shockwave 3. 12 weeks after start with ESWT or sham-shockwave 4. 24 weeks after start with ESWT or sham-shockwave	1. Baseline 2. End of treatment (2 months)	1. Baseline 2. Week 1 (after sports in the control) 3. Week 2 (after sports in the intervention week)	1. Baseline 2. End of the program (4 weeks)	1. Baseline 2. 6 weeks after injection 3. 3 months after injection 4. 1 year after injection (contacted by phone to fill out a standardized questionnaire on the pain severity and the return to sports activities)	1. Baseline 2. 6 weeks 3. 3 months 4. 6 months 5. 12 months	1. Baseline 2. Each of the 6 visits during 2 weeks	1. Baseline (only baseline measures) 2. Week 2 (pre and post intervention measures) 3. Week 3 (pre and post intervention measures)	1. Baseline 2. 6 weeks 3. 3 months	1. Baseline 2. Follow-up was begun 2 months after the last injection, and every 4 months with a 2-year minimum follow-up	1. Baseline 2. End of treatment (3 months) 3. 2 years 4. 5 years 5. 10 years	1. Baseline 2. 1 week after final shockwave treatment 3. 4 weeks after final shockwave treatment 4. 7 weeks after final shockwave treatment 5. 14 weeks after final shockwave treatment	1. Baseline 2. Last appointment, at a mean 7.1 ± 2.5-year follow for group 1 and 6.9 ± 3.1 years for group 2	1. Baseline 2. After last injection (4 weeks) 3. 3 months 4. Every 6 months with a 2-year minimum follow-up	1. Baseline 2. 3 weeks after treatment 3. 6 weeks after treatment 4. 9 weeks after treatment 5. 12 weeks after treatment 6. ≥ 26 weeks after treatment	1. Baseline 2. 6 weeks after injection 3. 12 weeks after injection 4. 16 weeks after injection 5. 26 weeks after injection	1. Baseline 2. Two months after treatment 3. Six months after treatment 4. Twelve months after treatment	1. Baseline 2. 1 month after treatment 3. 3 months after treatment 4. 12 months after treatment	1. Baseline 2. Week 6 3. Week 12 4. Week 24	1. Baseline 2. Follow up after injection (mean 18.4 (SD=4.9) months)	1. Baseline 2. End of treatment(s)	1. Baseline 2. Week 4 (end of treatment) 3. Week 24	1. Baseline 2. 6 months after first injection 3. 12 months after first injection 4. 24 months after first injection	Questionnaires were administered preoperatively, 1 year postoperatively and then annually An ultrasound was performed in all patients prior to inoculation and at 6 months after the injection to objectively evaluate tendon healing	1. Baseline 2. 12 months 3. 44 months	1. Baseline 2. 1 year 2. 2 years 3. 5 years	1. Baseline 2. Final consultation (mean of 45 weeks after start treatment)	1. Baseline 2. Week 1 3. Week 12 4. Week 22	1. Baseline Sclerosing injections 6-8 weeks after each treatment Arthroscopy 2. 2 weeks postoperatively 3. 6-8 weeks postoperatively 4. 6 months postoperatively 5. 12 months postoperatively	1. Screening 2. Baseline 3. Implant 4. 6 weeks 5. 3 months 6. 6 months	1. Baseline 2. Week 6 (after training program) 3. Week 12	1. Baseline 2. After treatment 3. 6 months	1. Baseline 2. 1 week after final treatment 3. 12 weeks after final treatment 4. 22 weeks after final treatment	1. Baseline 2. 3 months	1. Baseline 2. After intervention period (week 12) 3. Week 26	1. Baseline 2. Three months postoperatively 3. Six months postoperatively 4. Last follow-up (average 22 months)	1. Baseline 2. After one treatment session 3. 1 month after treatment	1. Baseline 2. End of intervention (12 weeks)	1. Baseline 2. After injection (mean = 9 months)	1. Baseline 2. 1 month 3. 6-12 months 4. 13-24 months 5. Over 24 months	1. Baseline 2. Post-procedure follow up (mean follow up period was 14.8 months, range 6-22)	1. Baseline 2. After rehabilitation period (12 weeks)	1. Baseline 2. 1 month 3. 3 months 4. 6 months 5. 12 months, and then once a year	1. Baseline 2. 4 months 3. 8 months 4. 12 months	1. Baseline 2. 3 months 3. 6 months 4. 12 months	1. Baseline 2. Week 12	1. Baseline 2. Week 6 3. Week 12 (end of intervention) 4. Week 30
Conclusion	This is the first study identifying prognostic outcome factors in arthroscopic treatment of chronic PT. Preoperative IFP edema alone or simultaneous BME and IFP edema on preoperative MRI were associated with inferior functional outcome and delayed return to sports. Knowledge of these predictive factors might improve risk stratification, individualize treatment and postoperative rehabilitation, an…	Both protocols appear efficacious for in-season athletes to reduce pain, however, isometric contractions demonstrated significantly greater immediate analgesia throughout the 4-week trial. Greater analgesia may increase the ability to load or perform	This study showed no additional effect of 3 sessions ESWT in participants with PT treated with eccentric exercises. The results should be interpreted with caution because of small sample size and considerable loss to follow-up, particularly in the ESWT group	The results obtained with the combination of USGET and eccentric exercise reported better outcomes than with the conventional electrophysiotherapy techniques in the treatment of patellar tendinopathy	This study's findings indicate that an orthosis (including placebo tape) during sports can reduce pain in PT patients in the short term	This is the first study to show a decrease in patellar tendon pain without a modification of training and competition load and the first study to investigate isometric exercises in a clinical setting. Both isometric and isotonic exerciseprograms are easy-to-use exercises that can reduce pain from patellar tendinopathy for athletes in-season	The comparison between one or two infiltrations of PRP did not reveal any difference between the two groups at short to mid term. A second closely-timed infiltration of PRP to treat proximal patellar tendinopathies is not necessary to improve the efficacy of this treatment in the short term	This study demonstrated that both the ABI and saline groups experienced a significant improvement in symptoms. However, when the results were compared, there was no statistical difference between the 2 groups	A placebo effect occurred with the sham treatment group. Generally, improvement was noted in all groups regardless of treatment type, but greater pain reduction during a functional task was evident within the active treatment groups during the sit-to-stand test. The wireless patch and wired dose controller treatments were equivalent across all variables	A single resistance training bout of isometric contractions reduced tendon pain immediately for at least 45 min postintervention and increased MVIC. The reduction in pain was paralleled by a reduction in cortical inhibition, providing insight into potential mechanisms. Isometric contractions can be completed without pain for people with PT. The clinical implications are that isometric muscle cont…	This study demonstrates that a local infiltration of PRP associated with a submaximal eccentric protocol can improve symptoms of chronic jumper’s knee in patients non-responsive to classical conservative treatments	Two consecutive PRP injections in chronic patellar tendinopathy showed better improvement in outcomes when compared to single injection	Treatment with the US-guided EPI technique and eccentric exercises in patellar tendinopathy resulted in a great improvement in knee function and a rapid return to the previous level of activity after few sessions. The procedure has proved to be safe with no recurrences on a long-term basis	There were no statistically significant differences in effectiveness between FSWT and RSWT. It is therefore not possible to recommend one treatment over the other on grounds of outcome. Both groups improved significantly, although it is questionable whether this difference is clinically relevant	This procedure is not technically demanding and provides a high rate of good and excellent outcomes in the long term	In this study, application of 3 consecutive US-guided PRP injections significantly improved symptoms and function in athletes with chronic PT and allowed fast recovery to their presymptom sporting level. The PRP treatment permitted a return to a normal architecture of the tendon as assessed by MRI	A therapeutic regimen of standardized eccentric exercise and ultrasound-guided leukocyte-rich PRP injection with DN accelerates the recovery from patellar tendinopathy relative to exercise and ultrasound-guided DN alone, but the apparent benefit of PRP dissipates over time	This study extensively describes, based on current knowledge, a physical therapy program after PRP injection for patellar tendinopathy patients. The combination treatment reported in this study is feasible and seems to be promising for patients in the late/degenerative phase of patellar tendinopathy	Therapeutic injections of PRP lead to better midterm clinical results compared with focused ESWT in the treatment of jumper’s knee in athletes	Traditional treatments of chronic patellar tendinopathy are generally lengthy, with frequent recurrences and, in many instances, provide no significant improvement of the symptoms. In our hands, low-energy radial SWT is safe and effective up to 12 months from the last application. Further randomized, prospective studies are needed to confirm our findings	It seems that continuous topical GTN treatment in addition to an eccentric exercise programme does not improve clinical outcome compared to placebo patches and an eccentric exercise programme in patients with chronic patellar tendinopathy	After PRP treatment, patients with patellar tendinopathy showed a statistically significant improvement. In addition, these improvements can also be considered clinically meaningful. However, patients who were not treated before with ethoxysclerol, cortisone, and/or surgical treatment showed the improvement	Although this study may have several limitations regarding its design and the evaluation methods used, the results show that hyaluronan injection therapy for athletic patients with patellar tendinopathy is an optional but effective treatment	Eccentric training and static stretching exercises is superior to eccentric training alone to reduce pain and improve function in patients with patellar tendinopathy at the end of the treatment and at follow-up	Sclerosing treatment with polidocanol resulted in a moderate improvement in knee function and reduced pain in a heterogeneous group of patients with patellar tendinopathy. Nevertheless, few of the patients were cured, and the majority still had reduced function and substantial pain after 24 months of follow-up	This study investigates the use of BM-MNCs for the treatment of chronic patellar tendinopathy. Patients showed statistically clinical improvement at 5-year followup. Inoculation of BM-MNCs could be considered as a potential therapy for those patients with chronic patellar tendinopathy refractory to nonoperative treatments	Sclerosing treatment with polidocanol was effective for the majority of the patients. Nevertheless, one-third elected to seek additional treatment through arthroscopic surgery during the 44-month follow-up period	Arthroscopic surgery for patients with patellar tendinopathy, refractory to nonoperative management, appears to provide significant improvements in symptoms and function, with improvements maintained for at least 3 years. These results suggest that some patients may not be able to achieve their presymptom sporting level; or if they do, they may participate in sports with some degree of residual s…	There was a reduction in pain and an improvement in ultrasound appearance following ultrasound-guided dextrose injections for refractory patellar tendinopathy. An improved hypoechoic appearance of the tendon was associated with decreased pain scores, suggesting that dextrose injections may modify patellar tendinopathy at the tissue level and that fi brillar changes may play a role in tendon nocic…	Extracorporeal shockwave therapy as a solitary treatment during the competitive season has no benefit over placebo treatment in the management of actively competing jumping athletes with patellar tendinopathy who have symptoms for less than 12 months	Both treatment with ultrasound and colour Doppler- guided sclerosingpolidocanol injections and arthroscopic shaving showed good clinical results, but patients treated with arthroscopic shaving had less pain and were more satisfied with the treatment result. Because surgical treatment is a one-stage treatment return to sports was faster in this group	Ultrasound-guided injection of autologous skin-derived tendon-like cells can be safely used in the short term to treat patellar tendinopathy, with faster response of treatment and significantly greater improvement in pain and function than with plasma alone	Short-term training using inertial eccentric overload, resulted in improved muscle function and reduced subjective pain in long-lasting patellar tendinopathy	The clinical results of our study are encouraging and suggest this method can be useful for the treatment of chronic patellar tendinopathy, even in difficult cases with refractory tendinopathy where the only physiotherapy approach had failed	The TOPGAME study is the first RCT to evaluate the effectiveness of patient-guided ESWT in athletes with early-phase symptomatic patellar tendinopathy who are still in training and competition	Patient guided Piezo-electric ESWT without local anesthesia is a safe and well tolerated treatment which should be considered as a treatment for patients with patellar tendinopathy	CORT has good short-term but poor long-term clinical effects, in patellar tendinopathy. HSR has good short- and long-term clinical effects accompanied by pathology improvement and increased collagen turnover	Surgical treatment is indicated in motivated athletes if carefully followed conservative treatment is unsuccessful after more than six months, making it impossible to practice a sport (Blazina grade 3). Arthroscopic techniques seem to be as effective as open surgery with an equivalent delay for beginning sports activities	The results show that the patellar tendon may be only the zone of perceived pain and that interesting results can be obtained by treating the muscular fascia of the quadriceps muscle, whose alteration may cause motor incoordination and subsequent pathology	These findings suggest that LIPUS does not provide any additional benefit over and above placebo in the management of symptoms associated with PT	High volume injections to mechanically disrupt the neovascularisation in patellar tendinopathy are helpful in the management of this condition. Controlled trials would be warranted to investigate in a more conclusive fashion this management modality	The outcome of the described shock wave treatment appears to be satisfactory and confirms the role of this alternative treatment in the management of the tendon disorders	Dry needling and autologous blood injection under ultrasound guidance shows promise as a treatment for patients with patellar tendinosis	In patients with patellar tendinopathy pain, two-legged eccentric overload training twice per week, using the new device (Bromsman®), were as efficient and safe as the present standard daily eccentric one-legged rehabilitation-training regimen using a decline board	Extracorporeal shockwave therapy appeared to be more effective and safer than traditional conservative treatments in the management of patients with chronic patellar tendinopathy	Sclerosing injections with polidocanol resulted in a significant improvement in knee function and reduced pain in patients with patellar tendinopathy	No advantage was demonstrated for surgical treatment compared with eccentric strength training. Eccentric training should be tried for twelve weeks before open tenotomy is considered for the treatment of patellar tendinopathy	Eccentric, but not concentric, quadriceps training on a decline board, seems to reduce pain in jumper’s knee	There was no effect on knee function from a 12-week program with eccentric training among a group of volleyball players with patellar tendinopathy who continued to train and compete during the treatment period. Whether the training would be effective if the patients did not participate in sports activity is not known
[truncated: 7 more columns]
