# Supplementary material
Source: HighWire-hosted journal article supplement (https://bjsm.bmj.com/content/54/11/627)
Supplement: inline-supplementary-material-10 [file inline-supplementary-material-10.pdf]

# ICON PART-T International CONsensus on the recommended reporting standards for PARTicipant characteristics in Tendinopathy research

**Currently there is no agreement on what to report in tendon studies!**

**We need adequate description of participant characteristics in a tendon study to be able to:**

- identify precisely the phenotype being reported on
- directly implement findings into clinical practice - i.e. the generalizability
- pool studies' findings accurately
- potentially identify confounding factors in the study's data

## What do I need to report?

### **Demographics**

Age  
Sex  
Body Mass  
Standing Height

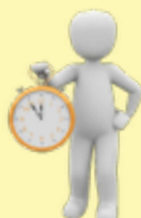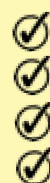

### **Tendinopathy descriptors**

Duration of symptoms  
Severity of symptoms  
Level of disability  
Location of symptoms  
Loading tests used

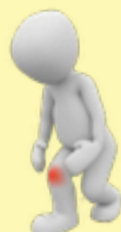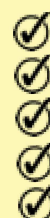

### **General health and comorbidities**

Medication use history  
Physical Activity Level  
Presence of co-morbidities  
History of tendinopathy

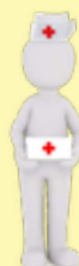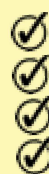

### **Recruitment and Screening**

Recruitment source & strategy  
Use of imaging to screen

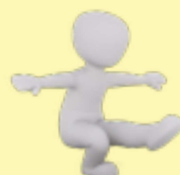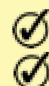

Use the  
checklist to  
ensure you list  
all criteria!  
Download at:

**Questions?** Contact Ebonie Rio - [e.rio@latrobe.edu.au](mailto:e.rio@latrobe.edu.au)
