# Supplementary material
Source: HighWire-hosted journal article supplement (https://bjsm.bmj.com/content/54/11/627)
Supplement: inline-supplementary-material-11 [file inline-supplementary-material-11.pdf]

## ICON PART-T International CONsensus on the recommended reporting standards for PARTicipant characteristics in Tendinopathy research

### Comorbidities and medication questioning guide

Asking about certain medical conditions and medications may have important implications for the underlying tendon problem. Many studies however do not adequately report these.

#### What do I need to ask?

##### **Comorbidities**

- Inflammatory or rheumatoid arthritis
- Psoriasis
- Inflammatory bowel or eye disease
- Ankylosing Spondylitis
- Gout
- Diabetes (type 1 or 2) or impaired glucose sensitivity
- Hypertension or cardiac disease
- Hypertriglyceridemia and/or high cholesterol
- Familial hypercholesterolemia
- Collagen disorders such as Ehlers Danlos syndrome
- Fibromyalgia

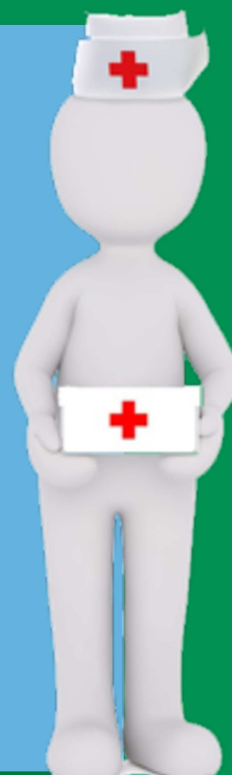

##### **Medications**

- Fluoroquinolone antibiotics (e.g. ciprofloxacin)
- Corticosteroids
- Anti-inflammatory medications
- Statin medication (for cholesterol)
- Medication for diabetes
- Allopurinol (gout medication)
- Aromatase inhibitors (used post breast cancer)

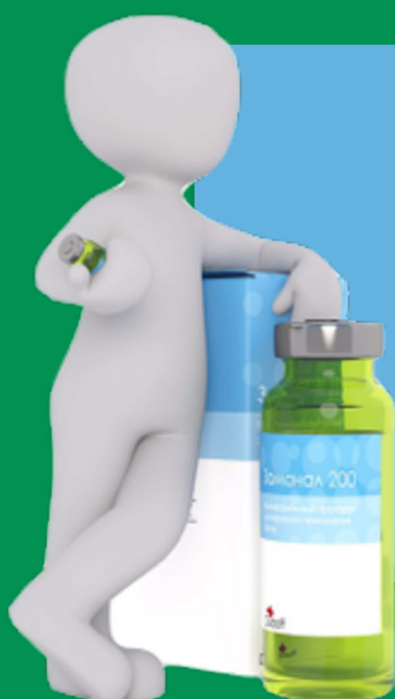

**More information in the 2019 Groningen Consensus paper**  
Questions? Contact Ebonie Rio - [e.rio@latrobe.edu.au](mailto:e.rio@latrobe.edu.au)  
Special acknowledgement to Dr Jon Rees & Paul Kirwan
